# Supplementary material
Source: publisher figshare collection journal article supplement (https://karger.figshare.com/ndownloader/files/8955703)
Supplement: Supplementary file 1 [file 8955703]

## Erratum

---

In the article by Matsubara A, Murakami G, Niikura H, Kinugasa Y, Fujimiya M, Usui T: Development of the Human Retroperitoneal Fasciae. *Cells Tissues Organs* 2009;190:286–296 (DOI: 10.1159/000209231), the authors asked for the following errors to be corrected: in figure 3c the labeling SP (for spleen) should be replaced by LAD (for left adrenal gland) and related changes should be made in the legend to this figure (page 290) and in the Results section (pages 288 and 290) as shown below in italics. The authors apologize for the mistakes but would like to stress that this error is not relevant to the main content of the paper, especially in the Discussion section.

### Results

#### *Later-Stage Group*

(Starting with the fifth sentence:) ... The peritoneum and anterior RF were often difficult to discriminate, especially near the colon after fixation to the retroperitoneal tissue (fig. 2, 3; see also below). *The spleen was separated from either the left kidney or adrenal (not shown) by a recess of the peritoneal cavity.* At the supero-inferior level where the kidney was present, the mesonephric fold changed into a tight, thick and flat connective tissue mass attached to the

peritoneum near the genital artery and vein. The fetal adrenal cortex was surrounded by the RF (fig. 3c). The anterior and posterior RFs divided into two laminae, which formed a thick capsule for the anterior and posterior lobes of the cortex, respectively. At a more superior level, these two lobes united to form an extensive cortex, simulating a cap on the kidney. *A single lamina from the RFs was identifiable between the left kidney and adrenal (fig. 3c).* The anlage of the adrenal medulla and celiac ganglion was located on the anterior side of the posterior RF (not shown).

**Fig. 3.** *Left adrenal and descending colon attached to the RF shown in horizontal section of a male fetus at 23 weeks of gestation (CRL 170 mm).* **a** Visceral topohistology around the left kidney. DC = Descending colon; J = jejunum; K = kidney; *LAD = left adrenal*; P = pancreas; PM = psoas major muscle; RA = renal artery; SMA = superior mesenteric artery. **b, c** Higher magnifications of the insets shown in **a**. **b** LF (☆), RF (○) and TFs (⇒) at the posterolateral angle of the colon. The LF extends anterolaterally into a very narrow space between the colon adventitia (▶) and TF. However, small vessels (long arrow) are present between these fasciae. **c** A space between the capsules of *the left adrenal and kidney*. Only a single lamina (▶) is identified in the space.
